# Supplementary material
Source: publisher figshare collection journal article supplement (https://gsajournals.figshare.com/ndownloader/files/16350245)
Supplement: Supplementary file 1 [file 16350245]

## Sheet: Folha1
Supplementary file 2. GO term enrichment analysis of the genes specifically duplicated in D. rugosa and T. ciferrii, with indication of the GO term, GO term definition, species presenting the enrichment and respective p-value.
GO term	GO term definition	Species	p-value
GO:0004190	aspartic-type endopeptidase activity	D. rugosa	9.227300e-21
GO:0042929	ferrichrome transporter activity	D. rugosa	5.583620e-04
GO:0005576	extracellular region	D. rugosa	2.967870e-05
GO:0005886	plasma membrane	D. rugosa	1.562220e-05
GO:0009277	fungal-type cell wall	D. rugosa	5.583620e-04
GO:0031225	anchored component of membrane	D. rugosa	1.693030e-10
GO:0006508	proteolysis	D. rugosa	2.607230e-09
GO:0006950	response to stress	D. rugosa	2.967870e-05
GO:0005777	peroxisome	D. rugosa	3.981660e-05
GO:0016491	oxidoreductase activity	D. rugosa, T. ciferrii	1.617710e-15, 1.817410e-10
GO:0016021	integral component of membrane	D. rugosa, T. ciferrii	3.899630e-05, 1.303980e-10
GO:0055085	transmembrane transport	D. rugosa, T. ciferrii	4.701260e-07 7.937910e-14
GO:0055114	oxidation-reduction process	D. rugosa, T. ciferrii	9.747380e-12, 2.407090e-06
GO:0015171	amino acid transmembrane transporter activity	T. ciferrii	4.117240e-06
GO:0016712	oxidoreductase activity, acting on paired donors, with incorporation or reduction of molecular oxygen, reduced flavin or flavoprotein as one donor, and incorporation of one atom of oxygen	T. ciferrii	3.007180e-06
GO:0006633	fatty acid biosynthetic process	T. ciferrii	6.716860e-04
GO:0004499	N,N-dimethylaniline monooxygenase activity	T. ciferrii	4.117240e-06
